# Supplementary material for: Bacterial profile of bovine mastitis in Ethiopia: a systematic review and meta-analysis
Source: PeerJ. 2022 May 6;10:e13253. doi: 10.7717/peerj.13253 (PMC9083533; doi:10.7717/peerj.13253)
Supplement: Supplemental Information 2 [file peerj-10-13253-s002.xlsx]

## Sheet: Sheet1
authorpubyear	yearofstudy	yearofstudy(1= ≥ 2013, 2 = < 2013)	case(clinical or subclinical)	cases	samplesize	apparent prevalence	poolby(1=pool,2=group)	clinicalmastitis	subclinicalmastitis	diagnostic method (1=CE,CMT and Bacteriology, 2=CE,CMT, 3=CMT and Bacteriology)	type of mastitis (1=clinical, 2=subclinical,)	agro-ecology(1=highland, 2=midland,3=lowland,4=mid and low-land)	production system(1=extensive, 2=intensive, 3=both)	local	cross	studysite	latitudey	longitudex	countryparts	region	staphaureuscases	staphaureus(1=report, 0=no report )	staphaureustotal	staphaureustotalcoded(1=pool,0=no)	Strepsppcases	Strepspp(1=report, 0=no report )	Strepspptotal	Strepspptotalcoded(1=pool,0=no)	StrepAgalactiacases	Streptagalactia(1=report, 0=no report )	Strepagalactiatotal	Strepagalactiatotalcoded(1=pool,0=no)	Strepdysagalactiacases	Streptdysagalactia(1=report, 0=no report )	Strepdysagalactiatotal	Strepdysagalactiatotalcoded(1=pool,0=no)	Strepuberiscases	Strepuberis(1=report, 0=no report )	Strepuberistotal	Strepuberistotalcoded(1=report, 0=no report )	Staph.epidermiscases	Staph.epidermis(1=report, 0=no report )	Staphepidermistotal	Staphepidermistotalcoded(1=pool, 0=no)	E.colicases	E.coli(1=report, 0=no report)	E.colicasestotal	E.colitotalcoded(1=pool, 0=no)	CNScases
Abebe et al., 2016	2015	1	313	331	529	0.626	2		0.592	1	2	2	2	83	446	Hawassa	7.06526	38.4937	Southern Ethiopia	SNNP	84	1	88	1		0		0		0		0		0		0		0		0		0		0		0		0
Abebe et al., 2016	2015	1	18	331	529	0.626	1	0.034		1	1	2	2	83	446	Hawassa	7.06526	38.4937	Southern Ethiopia	SNNP	4	1		0		0		0		0		0		0		0		0		0		0		0		0		0
Abebe et al., 2020	2018	1	330	372	686	0.542	2		0.481	1	2	2	2			Hawassa	7.16526	38.7937	Southern Ethiopia	SNNP	176	1	210	1	57	1	55	1		0		0		0		0		0		0		0		0	53	1	53	1
Abera et al., 2012	2009	2	51	61	201	0.303	2		0.254	1	2	2	2	18	183	Hawassa	7.17526	38.4937	Southern Ethiopia	SNNP	34	1		0	20	1	20	1	8	1	8	1		0		0		0		0		0		0	2	1	2	1	11
Abunna et al., 2013	2009	2	122	173	331	0.523	2		0.3686	1	2	1	3		331	Addis Ababa	9.04089	38.7613	Central Ethiopia	Addis Ababa	15	1	15	1	26	1	26	1	13	1	3	1	4	1	4	1		0		0		0		0	5	1	5	1	8
Adane et al., 2017	2012	2	7	35	384	0.09	1	0.018		1	1	3	3	352	32	Jigjiga	9.35085	42.8004	Eastern Ethiopia	Somali	2	1	12	1	4	1	11	1		0		0		0		0		0		0		0		0		0		0
Adane et al., 2017	2012	2	28	35	384	0.09	2		0.073	1	2	3	3	352	32	Jigjiga	9.35085	42.8004	Eastern Ethiopia	Somali	10	1		0	7	1		0		0		0		0		0		0		0		0		0	1	1	1	1
Alagaw et al., 2017	2015	1	12	84	320	0.263	1	0.0375		1	1	1	3	193	127	Wolaita Sodo	6.86456	37.7628	Southern Ethiopia	SNNP	10	1	53	1	11	1	44	1	1	1	16	1	10	1	18	1		0		0		0		0	4	1		0
Alagaw et al., 2017	2015	1	72	84	320	0.263	2		0.225	1	2	1	3	193	127	Wolaita Sodo	6.86456	37.7628	Southern Ethiopia	SNNP	43	1		0	33	1		0	15	1		0	8	1		0		0		0		0		0	7	1	11	1	27
Amdhun et al., 2016	2010	2	42	62	384	0.162	2		0.109	1	2	4	1	384		Tullo District	7.96371	39.8251	Eastern Ethiopia	Oromia	35	1	39	1	14	1	24	1	4	1		0		0		0		0		0	10	1	15	1	21	1	47	1
Amdhun et al., 2016	2010	2	20	62	384	0.162	1	0.052		1	1	4	1	384		Tullo District	7.96371	39.8251	Eastern Ethiopia	Oromia	4	1		0	10	1		0	6	1	10	1		0		0		0		0	4	1		0	26	1		0
Amin et al., 2017	2016	1	160	189	384	0.492	2		0.417	1	2	2	2	293	91	Haramaya Town	9.39472	42.0131	Eastern Ethiopia	Oromia		0		0	37	1	49	1	16	1		0	8	1	13	1	13	1	15	1		0		0		0		0
Amin et al., 2017	2016	1	29	189	384	0.492	1	0.075		1	1	2	2	293	91	Haramaya Town	9.39472	42.0131	Eastern Ethiopia	Oromia		0		0	12	1		0	5	1	21	1	5	1		0	2	1		0		0		0		0		0
Asmare and Kassa, 2017	2016	1	34	34	67	0.507	1	0.57		1	1	2	2		67	Wolaita Sodo	6.83336	37.7497	Southern Ethiopia	SNNP	23	1	23	1	12	1	12	1		0		0		0		0		0		0		0		0	8	1	8	1	11
Belina et al., 2016	2014	1	192	237	471	0.503	2		0.407	1	2	1	3	327	144	Borana zones	7.16526	38.4937	Southern Ethiopia	Oromia	20	1	20	1		0		0		0		0		0		0		0		0		0		0	3	1	3	1	20
Birhanu et al., 2017	2016	1	170	170	262	0.649	1		0.161	3	2	2	2		262	Debre Zeit	10.7857	35.8912	Central Ethiopia	Oromia	67	1	71	1	42	1	42	1		0		0		0		0		0		0		0		0	15	1	15	1	25
Bitew et al., 2010	2009	2	9	85	302	0.281	1	0.03		1	1	2	3	136	166	Bahir Dar Town	11.4948	37.288	Northern Ethiopia	Amhara	4	1		0		0		0		0		0		0		0		0		0		0		0	2	1	2	1
Bitew et al., 2010	2009	2	76	85	302	0.281	2		0.252	1	2	2	3	136	166	Bahir Dar Town	11.4948	37.288	Northern Ethiopia	Amhara	12	1	16	1	13	1	13	1	7	1	7	1	4	1	4	1	2	1	2	1		0		0		0		0	41
Bogale et al., 2018	2010	2	346	393	1019	0.386	2		0.339	1	2	4	1	1019		West Hararghe	9.59217	41.8635	Eastern Ethiopia	Oromia	159	1		0	638	1		0	190	1		0		0		0		0		0	149	1	151	1	155	1	158	1
Bogale et al., 2018	2010	2	47	393	1019	0.386	1	0.046		1	1	4	1	1019		West Hararghe	9.59217	41.8635	Eastern Ethiopia	Oromia	10	1	169	1	12	1	650	1	2	1	192	1		0		0		0		0	2	1		0	3	1		0
Demissie et al., 2018	2016	1	34	130	360	0.361	1	0.094		1	1	2	2	40	320	Wukro	13.7868	39.603	Northern Ethiopia	Tigray	7	1	55	1		0		0		0		0		0		0		0		0		0		0	3	1	46	1	7
Demissie et al., 2018	2016	1	96	130	360	0.361	2		0.267	1	2	2	2	40	320	Wukro	13.7868	39.603	Northern Ethiopia	Tigray	48	1		0	7	1	7	1		0		0		0		0		0		0		0		0	43	1		0	22
Dereje et al., 2018	2015	1	121	131	186	0.704	2		0.6505	1	2	1	2		186	Holeta	9.07942	38.4902	Central Ethiopia	Oromia	30	1	30	1	22	1	22	1	5	1	5	1	5	1	18	1	12	1	17	1		0		0	6	1	6	1	14
Duguma et al., 2013	2010	2	66	73	90	0.811	2		0.733	1	2	1	2		90	Holeta	9.07942	38.4902	Central Ethiopia	Oromia	73	1		0	40	1	45	1	19	1	22	1	13	1		0	5	1		0		0		0		0		0	7
Duguma et al., 2013	2010	2	7	73	90	0.811	1	0.078		1	1	1	2		90	Holeta	9.07942	38.4902	Central Ethiopia	Oromia	5	1	78	1	5	1		0	3	1		0		0		0		0		0		0		0		0		0
Disasa et al, 2016	2015	1	111	131	334	0.392	2		0.332	1	2	3	2	87	247	Dire Dawa	9.59132	41.8566	Eastern Ethiopia		76	1	76	1		0		0		0		0		0		0		0		0	20	1	20	1		0		0
Elemo et al., 2018	2014	1	122	141	384	0.367	2		0.3177	1	2	2	3	308	76	Sinana	7.07248	40.0181	Southeastern Ethiopia	Oromia	121	1	121	1	116	1	116	1	81	1	81	1	21	1	21	1	14	1	14	1	34	1	30	1	27	1	27	1	26
Gebisa et al., 2019	2019	1	194	194	474	0.409	1			1	2	4	3			Buno Bedele	8.16667	36.3333	Southwestern Ethiopia	Oromia	104	1	104	1		0		0		0		0		0		0		0		0		0		0		0		0
Getahun et al., 2007	2007	2	16	168	500	0.336	1	0.032		1	1	2	3		500	Selalle	9.68572	38.8982	Central Ethiopia	Oromia	2	1	85	1	6	1	64	1	3	1		0	3	1	9	1		0		0	1	1	44	1		0		0
Getahun et al., 2007	2007	2	152	168	500	0.336	2		0.304	1	2	2	3		500	Selalle	9.68572	38.8982	Central Ethiopia	Oromia	83	1		0	58	1		0	25	1	28	1	3	1		0	20	1	20	1	43	1		0	1	1	1	1
Haftu et al., 2012	2010	2	103	114	305	0.374	2		0.338	1	2	2	2		305	Mekelle	13.4966	39.4768	Northern Ethiopia	Tigray	43	1		0	10	1		0	6	1		0	1	1	4	1	3	1	3	1		0		0	19	1	35	1	10
Haftu et al., 2012	2010	2	11	114	305	0.374	1	0.036		1	1	2	2		305	Mekelle	13.4966	39.4768	Northern Ethiopia	Tigray	3	1	46	1	6	1	7	1	3	1	9	1	3	1		0		0		0		0		0	16	1		0	1
Hailemeskel et al., 2014	2012	2	116	128	144	0.888	2		0.806	1	2	1	3		144	North Showa	9	39	Central Ethiopia	Amhara	17	1	17	1	1	1		0		0		0		0		0	1	1	1	1		0		0		0		0	20
Kedir et al., 2016	2015	1	111	131	334	0.392	2		0.3323	1	2	3	3	87	247	Dire Dawa	9.69132	42.8566	Eastern Ethiopia	Dire Dawa	76	1	76	1		0		0		0		0		0		0		0		0		0		0		0		0	54
Kitila et al., 2021	2017	1	121	210	532	0.395	2		0.227	1	2	1	1	532		West Wollega	9.07481	36.5853	Western Ethiopia	Oromia	64	1	83	1		0		0		0		0		0		0		0		0		0		0		0		0
Kitila et al., 2021	2017	1	89	210	532	0.395	1	0.167		1	1	1	1	532		West Wollega	9.07481	36.5853	Western Ethiopia	Oromia	19	1		0		0		0		0		0		0		0		0		0		0		0		0		0
Kumbe et al., 2020	2018	1	136	187	384	0.487	2		0.354	1	2	3	1	384		Borena zone	5.04715	38.3691	Southern Ethiopia	Oromia	43	1	59	1	31	1	33	1		0		0		0		0		0		0		0		0		0		0	14
Kumbe et al., 2020	2018	1	46	187	384	0.487	1	0.12		1	1	3	1	384		Borena zone	5.04715	38.3691	Southern Ethiopia	Oromia	16	1		0	2	1		0		0		0		0		0		0		0		0		0		0		0	16
Lakew et al., 2009	2008	2	85	144	223	0.646	2		0.38	1	2	1	2	92	131	Asella	7.95	39.1333	Southastern Ethiopia	Oromia	15	1	32	1	16	1	31	1	8	1	17	1	5	1	9	1	3	1	5	1		0		0	2	1	10	1	18
Lakew et al., 2009	2008	2	59	144	223	0.646	1	0.265		1	1	1	2	92	131	Asella	7.95	39.1333	Southastern Ethiopia	Oromia	17	1		0	15	1		0	9	1		0	4	1		0	2	1		0		0		0	8	1		0	5
Lakew et al., 2019	2019	1	216	242	384	0.63	2		0.5625	1	2	4	2	74	310	Haramaya District	9.69472	41.0131	Eastern Ethiopia	Oromia		0		0	25	1	25	1	25	1	25	1		0		0		0		0		0		0		0		0
Madalcho, 2019	2012	2	105	124	349	0.355	2		0.301	1	2	2	3	237	112	Wolaita Sodo	6.76416	37.9628	Southern Ethiopia	SNNP	61	1	61	1	45	1	45	1	41	1	41	1	4	1	4	1	4	1	4	1		0		0	3	1	3	1
Mekibib et al., 2010	2009	2	52	76	107	0.71	2		0.486	1	2	2	2		107	Holeta Town	9.15942	38.4902	Central Ethiopia	Oromia	66	1	72	1	10	1	11	1	0	0		0		0		0		0		0		0		0	3	1	7	1	44
Mekibib et al., 2010	2009	2	24	76	107	0.71	1	0.224		1	1	2	2		107	Holeta Town	9.15942	38.4902	Central Ethiopia	Oromia	6	1		0	1	1		0	0	0		0		0		0		0		0		0		0	4	1		0	2
Mekonen et al, 2017	2016	1	316	316	510	0.619	1		0.62	1	2	2	2		316	Bahir Dar Town and Gondar	11.5948	37.388	North west	Amhara	44	1	44	1	13	1	13	1		0		0		0		0		0		0		0		0		0		0	67
Mekonnen and Tesfaye, 2010	2010	2	86	99	206	0.48	2		0.417	1	2	3	2			Adama	8.54103	39.2705	Central Ethiopia	Oromia	14	1	14	1	30	1	30	1	11	1	11	1	6	1	6	1	3	1	3	1		0		0	7	1	7	1	20
Meranga, 2012	2012	2	63	81	111	0.729	2		0.568	1	2	3	2		111	Alage State	7.2411	40.0677	Central Ethiopia	Oromia	22	1	27	1	6	1	8	1		0		0		0		0		0		0	11	1	13	1	11	1	13	1	37
Meranga, 2012	2012	2	18	81	111	0.729	1	0.162		1	1	3	2		111	Alage State	7.2411	40.0677	Central Ethiopia	Oromia	5	1		0	2	1		0		0		0		0		0		0		0	2	1		0	2	1		0	15
Nahom, 2021	2020	1	64	72	422	0.171	2		0.152	1	2	4	3	183	239	Gamo Zone	6.03698	37.5574	Southern Ethiopia	SNNP	26	1	26	1	17	1	17	1		0		0		0		0		0		0		0		0	7	1	7	1	9
Pal et al., 2017	2013	1	100	100	195	0.513	2		0.512	3	2	3	2		195	Asella	7.95	39.1333	Southastern Ethiopia	Oromia	20	1	20	1	19	1	19	1	3	1	3	1		0		0	7	1	7	1		0		0	14	1	14	1	15
Seid et al., 2015	2014	1	110	136	358	0.379	2		0.307	1	2	2	3	169	189	West Arsi	7.86372	39.7251	Southern Ethiopia	Oromia	37	1	37	1	22	1	22	1	15	1	15	1		0		0		0		0		0		0	4	1	4	1	14
Shiferaw and Telila, 2016	2014	1	52	134	386	0.347	1	0.1347		1	1	2	3	216	170	Wolaita Sodo	6.86416	37.7628	Southern Ethiopia	SNNP	15	1		0	7	1		0		0		0		0		0		0		0		0		0	7	1	15	1
Shiferaw and Telila, 2016	2014	1	82	134	386	0.374	2		0.2124	1	2	2	3	216	170	Wolaita Sodo	6.86716	37.7628	Southern Ethiopia	SNNP	25	1	40	1	12	1	19	1		0		0		0		0		0		0		0		0	8	1		0
Tadesse and Chanie, 2012	2011	2	66	196	300	0.653	1	0.22		1	1	1	2	71	229	Addis Ababa	9.14079	38.7613	Central Ethiopia	Addis Ababa	9	1		0	4	1	9	1		0		0		0		0		0		0		0		0	8	1	13	1	9
Tadesse and Chanie, 2012	2011	2	130	196	300	0.653	2		0.433	1	2	1	2	71	229	Addis Ababa	9.14079	38.7613	Central Ethiopia	Addis Ababa	25	1	34	1	5	1		0		0		0		0		0		0		0		0		0	5	1		0	20
Tegegne et al., 2020	2016	1	214	214	303	0.706	1		0.7062	1	2	1	2		303	Holeta	9.05942	38.4902	Central Ethiopia	Oromia	79	1	79	1	38	1	38	1	27	1	27	1	11	1	11	1		0		0		0		0	25	1	25	1	24
Tekle and Berhie, 2016	2011	2	41	43	96	0.447	2		0.427	1	2	2	3	60	36	Sidamo Zone	6.65546	38.4816	Southern Ethiopia	SNNP	11	1	11	1		0		0		0		0		0		0		0		0	7	1	7	1	2	1		0
Teklesilasie et al., 2014	2012	2	28	192	365	0.526	1	0.0767		1	1	1	2	25	340	Addis Ababa	9.04179	38.7613	Central Ethiopia	Addis Ababa	8	1		0	8	1	41	1	4	1	26	1		0		0		0		0		0		0	7	1	15	1	2
Teklesilasie et al., 2014	2012	2	164	192	365	0.526	2		0.4493	1	2	1	2	25	340	Addis Ababa	9.04179	38.7613	Central Ethiopia	Addis Ababa	22	1	30	1	33	1		0	22	1		0		0		0		0		0		0		0	8	1	0	0	21
Tesfaye and Abera, 2018	2017	1	131	136	216	0.629	2		0.6065	1	2	2	2	31	185	Jimma	8.05109	37.1326	Western Ethiopia	SNNP	62	1	65	1	23	1	24	1		0		0		0		0		0		0		0		0	34	1	35	1	70
Tesfaye and Abera, 2018	2017	1	5	136	216	0.629	1	0.023		1	1	2	2	31	185	Jimma	8.05109	37.1326	Western Ethiopia	SNNP	3	1		0	1	1		0		0		0		0		0		0		0		0		0	1	1	1	1
Tesfaye, 2017	2017	1	73	78	351	0.222	2		0.2079	1	2	1	3			Addis Ababa	9.01079	38.7613	Central Ethiopia	Addis Ababa	90	1	90	1	37	1	37	1	4	1	4	1		0		0	11	1	11	1		0		0	4	1	4	1	26
Workineh et al., 2002	1998	2	40	111	186	0.598	1	0.215		1	1	2	2		186	Debre Zeit	10.5857	35.7922	Central Ethiopia	Oromia	8	1	49	1	10	1	20	1	7	1	9	1	1	1	5	1	2	1	6	1		0		0	9	1	9	1	4
Workineh et al., 2002	1998	2	71	111	186	0.598	2		0.382	1	2	2	2		186	Debre Zeit	10.5857	35.7922	Central Ethiopia	Oromia	41	1		0	10	1		0	2	1		0	4	1		0	4	1		0		0		0		0		0	16
Yenew and Addis, 2020	2017	1	43	49	180	0.272	2		0.239	1	2	1	3	43	137	Dessie town	11.1226	39.635	Northeastern Ethiopia	Amhara	30	1	30	1		0		0		0		0		0		0		0		0		0		0	38	1	38	1	8
Yohannis and Mola, 2013	2012	2	9	103	349	0.295	1	0.026		1	1	2	3	139	210	Wolaita Sodo	6.76416	37.7628	Southern Ethiopia	SNNP	6	1	27	1		0		0		0		0		0		0		0		0		0		0	3	1	3	1
Yohannis and Mola, 2013	2012	2	94	103	349	0.295	2		0.269	1	2	2	3	139	210	Wolaita Sodo	6.76416	37.7628	Southern Ethiopia	SNNP	21	1		0	24	1	24	1	16	1	16	1	8	1	8	1		0		0	12	1	12	1	13	1		0
Zeryehun and Abera, 2017	2016	1	199	247	384	0.643	2		0.518	1	2	4	2	57	327	Eastern Harrarghe	9.59472	43.0131	Eastern Ethiopia	Oromia	13	1	45	1	40	1	55	1	30	1	32	1		0		0	7	1	7	1		0		0		0		0	62
Zeryehun and Abera, 2017	2016	1	48	247	384	0.643	1	0.125		1	1	4	2	57	327	Eastern Harrarghe	9.59472	43.0131	Eastern Ethiopia	Oromia	32	1		0	15	1		0	2	1		0	12	1	12	1		0		0		0		0		0		0	2
Zeryehun et al., 2013	2013	1	275	373	499	0.747	2		0.551	1	2	1	2		499	Addis Ababa	9.05079	38.7613	Central Ethiopia	Addis Ababa	23	1	23	1	32	1	32	1	17	1	17	1	7	1	7	1	8	1	8	1		0		0	15	1	15	1
[truncated: 28 more columns]
